# Supplementary material for: Changes in Dietary Behaviours during the COVID-19 Outbreak Confinement in the Spanish COVIDiet Study
Source: Nutrients. 2020 Jun 10;12(6):1730. doi: 10.3390/nu12061730 (PMC7353108; doi:10.3390/nu12061730)

## Supplementary Material

|                                                                                                                                                                                                                     |    |
|---------------------------------------------------------------------------------------------------------------------------------------------------------------------------------------------------------------------|----|
| Supplementary Table S1. COVIDiet questionnaire used to collect information on dietary habits/behaviours and lifestyle factors during the COVID-19 Spanish confinement. ....                                         | 2  |
| Supplementary Table S2. MEDAS-derived foods items by level of adherence to the MedDiet during the COVID-19 Spanish confinement .....                                                                                | 6  |
| Supplementary Table S3: Factors associated with adherence to the MedDiet during the Spanish confinement.....                                                                                                        | 7  |
| Supplementary Table S4. MEDAS-derived foods items by level of adherence to the MedDiet before the COVID-19 Spanish confinement .....                                                                                | 9  |
| Supplementary Table S5. Socio-demographic factors associated with the change in the adherence to the MedDiet during the Spanish confinement.....                                                                    | 11 |
| Supplementary Table S6: Subgroup analysis by gender on the association between fruits, vegetables and olive oil intake and the change in the adherence to the MedDiet during the COVID-19 Spanish confinement ..... | 12 |
| Supplementary Table S7: Sensitivity analyses performed on variables associated with the change in the adherence to the MedDiet during the Spanish confinement .....                                                 | 13 |
| Supplementary Figure S1: Relationship between weeks and days of confinement with adherence to the MedDiet and the relative change of adherence to MedDiet. ....                                                     | 16 |
| Supplementary Figure S2: Google Trends output for Web search queries for different terms. ....                                                                                                                      | 17 |

**Supplementary Table S1.** COVIDiet questionnaire used to collect information on dietary habits/behaviours and lifestyle factors during the COVID-19 Spanish confinement.

---

**Socio-demographic information**

---

**Gender**

Male

Female

Other

**Place of residence**

Alone

Family home

Shared flat

Student's residence

**Country**

**Do you have children in care?**

Yes

No

**Education and training qualifications**

University degree

Postgraduate, Master degree, Doctorate

Professional and vocational training

Primary studies

None

Other

**Age**

Between 18 to 20 years old

Between 21 y 35 years old

Between 36 y 50 years old

Between 51 y 65 years old

More than de 65 years old

**Weight (kg)**

---

**Dietary habits related to healthy diet**

---

Please, answer the following questions based on the PREDIMED test. This test contains information about the adherence to the Mediterranean Diet which is considered as a reference of a healthy diet.

---

**Is olive oil your main source of added fat for cooking?**

Yes

No

**How much olive oil do you consume in total per day (including used for frying, meals out of the house, salads, etc)?**

4 or more tablespoons

2-3.9 tablespoons

0-1.9 tablespoons

**Are you using more olive oil during the confinement compared to your usual intake?**

Yes. My intake of olive oil is higher

No. My intake of olive oil is lower

My intake of olive oil remains as usual

**How many servings of vegetables do you consume per day? (the garnish or accompaniments = 1/2 serving)**

**1 serving = 200 g**

2 or more servings

1-1.9 servings

0-0.9 servings

**Have you increased the intake of vegetables during the confinement compared to your usual intake?**

Yes. My intake of vegetables is higher

No. My intake of vegetables is lower

My intake of vegetables remains as usual

**How many pieces of fruit (including fresh juice) do you consume per day?**

3 or more pieces

1-2.9 pieces

0-0.9 pieces

**Have you increased the intake of fruits during the confinement compared to your usual intake?**

Yes. My intake of fruits is higher

No. My intake of fruits is lower

My intake of olive fruits remains as usual

**How many servings of red meats, hamburgers, sausages or deli meats do you consume per day? (Servings: 100-150 g)**

1 serving or more

0-0.9 servings

**Have you increased the intake of red meats, hamburgers, sausages or deli meats during the confinement compared to your usual intake?**

Yes. My intake of red meats, hamburgers, sausages or deli meats is higher

No. My intake of red meats, hamburgers, sausages or deli meats is lower

My intake of red meats, hamburgers, sausages or deli meats remains as usual

**How many servings of butter, margarine or cream do you consume per day? (individual portion: 12 g)**

1 serving or more

0-0.9 servings

**How many carbonated and/or sugary beverages (soda, cola, tonic, bitter) do you consume per day?**

1 serving or more

0-0.9 servings

**Have you increased the intake of carbonated and/or sugary beverages (soda, cola, tonic, bitter) during the confinement compared to your usual intake?**

Yes. My intake of carbonated and/or sugary beverages is higher

No. My intake of carbonated and/or sugary beverages is lower

My intake of carbonated and/or sugary beverages remains as usual

**Do you drink wine? How much do you consume per week?**

7 or more cups

3-6.9 cups

0-2.9 cups

I never drink wine

**How many servings of pulses do you consume per week? (one serving dish: 150 g)**

3 servings or more

1-2.9 servings

0-0.9 servings

**Have you increased the intake of pulses during the confinement compared to your usual intake?**

Yes. My intake of pulses is higher

No. My intake of pulses is lower

My intake of pulses remains as usual

**How many servings of fish-seafood do you eat per week? 1 piece: 100-150 g of fish or 4-5 pieces or 200 g seafood)**

3 servings or more

1-2.9 servings

0-0.9 servings

**Have you increased the intake of fish-seafood during the confinement compared to your usual intake?**

Yes. My intake of fish-seafood is higher

No. My intake of fish-seafood is lower

My intake of fish-seafood remains as usual

**How often do you have commercial (non-homemade) pastries such as cookies, custards, sweets or cakes per week?**

2 servings or more

0-1.9 servings

**Have you increased the intake of commercial (non-homemade) pastries such as cookies, custards, sweets or cakes during the confinement compared to your usual intake?**

Yes. My intake of commercial (non-homemade) pastries is higher

No. My intake of commercial (non-homemade) pastries is lower

My intake of commercial (non-homemade) pastries remains as usual

**Have you increased the intake of homemade pastries such as cookies, custards, sweets or cakes during the confinement compared to your usual intake?**

Yes. My intake of homemade pastries is higher

No. My intake of homemade pastries is lower

My intake of homemade pastries remains as usual

**How often do you eat nuts per week?**

3 servings or more

1-2.9 servings

0-0.9 servings

**Do you prefer chicken, turkey or rabbit meat instead of veal, pork, hamburgers or sausages?**

Yes

No

**How many times a week do you consume cooked vegetables, pasta, rice or other dishes seasoned with tomato, garlic, onion or leek sauce made over low heat with olive oil (sofrito)**

2 servings or more

1-1.9 servings

0-0.9 servings

---

**Information about dietary habits**

---

Due to the situation, it is possible that your dietary pattern has been altered. Thus, we request you to complete the additional items regarding to lifestyle, cooking way and intake pattern of some other food groups.

---

**How many main dishes (breakfast, lunch or dinner) do you used to take daily out of home before the confinement?**

1

2

3

None

**Have you increased the intake of alcoholic beverages (wine, beer, high-grade drinks) during the confinement compared to your usual intake?**

Yes. My intake of alcoholic beverages is higher

No. My intake of alcoholic beverages is lower

My intake of alcoholic beverages remains as usual

**Have you found difficult finding any type of food?**

Yes

No

**In case you have found difficult finding any type of food, please, indicate which food**

**What type of cooking are you employing these days?**

Fried

Oven

Microwave

Griddle

Stew

**Are you cooking more often than before the confinement started?**

Yes. I am cooking more now

No. I am cooking less now

I am cooking as usual

**Have you increased the intake of fried foods?**

Yes. My intake of fried foods is higher

No. My intake of fried foods is lower

My intake of fried foods remains as usual

**During the confinement, how often are you consuming fried food?**

Less than once time a week

1-3 times a week

4-6 times a week

7 or more than 7 times a week

Never

**When you consume fried foods, what type of oil do you use?**

Olive oil

Sunflower oil

Other

**Have you increased the frequency of snacking during the confinement compared to your usual intake?**

Yes. My snacking frequency is higher

No. My snacking frequency is lower

My snacking frequency remains as usual

**Have you increased the intake of fast-food during the confinement compared to your usual intake?**

Yes. My intake of fast-food is higher

No. My intake of fast-food is lower

My intake of fast-food remains as usual

**Do you think that you are eating more than usual during the confinement?**

Yes

No

**Have you modified your physical activity?**

It has increased

It has decreased

It remains as usual

I do not practice physical activity

**Have you gained weight during the confinement?**

Yes

No

I do not know

---

**Supplementary Table S2.** MEDAS-derived foods items by level of adherence to the MedDiet during the COVID-19 Spanish confinement

| MEDAS food groups <sup>1</sup>              | All (N=7,514) |      | Low (N=1,275) |      | Medium (N=4,129) |      | High (N=2,110) |      | p-value <sup>2</sup> |
|---------------------------------------------|---------------|------|---------------|------|------------------|------|----------------|------|----------------------|
|                                             | N             | %    | N             | %    | N                | %    | N              | %    |                      |
| <b>1. Olive oil for cooking</b>             |               |      |               |      |                  |      |                |      | <0.001               |
| No                                          | 135           | 1.8  | 48            | 3.8  | 68               | 1.6  | 19             | 0.9  |                      |
| Yes                                         | 7379          | 98.2 | 1227          | 96.2 | 4061             | 98.4 | 2091           | 99.1 |                      |
| <b>2. Olive oil (tablespoons/d)</b>         |               |      |               |      |                  |      |                |      | <0.001               |
| >4                                          | 2149          | 28.6 | 176           | 13.8 | 1035             | 25.1 | 938            | 44.5 |                      |
| 0-1.9                                       | 1344          | 17.9 | 311           | 24.4 | 756              | 18.3 | 277            | 13.1 |                      |
| 2-3.9                                       | 4021          | 53.5 | 788           | 61.8 | 2338             | 56.6 | 895            | 42.4 |                      |
| <b>3. Vegetables (servings/d)</b>           |               |      |               |      |                  |      |                |      | <0.001               |
| >2                                          | 2559          | 34.1 | 17            | 1.3  | 937              | 22.7 | 1605           | 76.1 |                      |
| 0-0.9                                       | 1276          | 17.0 | 504           | 39.5 | 712              | 17.2 | 60             | 2.8  |                      |
| 1-1.9                                       | 3679          | 49.0 | 754           | 59.1 | 2480             | 60.1 | 445            | 21.1 |                      |
| <b>4. Fruits (units/d)</b>                  |               |      |               |      |                  |      |                |      | <0.001               |
| >3                                          | 1851          | 24.6 | 47            | 3.7  | 686              | 16.6 | 1118           | 53.0 |                      |
| 0-0.9                                       | 1470          | 19.6 | 482           | 37.8 | 847              | 20.5 | 141            | 6.7  |                      |
| 1-2.9                                       | 4193          | 55.8 | 746           | 58.5 | 2596             | 62.9 | 851            | 40.3 |                      |
| <b>5. Red meat (servings/d)</b>             |               |      |               |      |                  |      |                |      | <0.001               |
| >1                                          | 1242          | 16.5 | 612           | 48.0 | 546              | 13.2 | 84             | 4.0  |                      |
| 0-0.9                                       | 6272          | 83.5 | 663           | 52.0 | 3583             | 86.8 | 2026           | 96.0 |                      |
| <b>6. Fats (servings/d)</b>                 |               |      |               |      |                  |      |                |      | <0.001               |
| >1                                          | 351           | 4.7  | 159           | 12.5 | 171              | 4.1  | 21             | 1.0  |                      |
| 0-0.9                                       | 7163          | 95.3 | 1116          | 87.5 | 3958             | 95.9 | 2089           | 99.0 |                      |
| <b>7. Sweet beverages (servings/d)</b>      |               |      |               |      |                  |      |                |      | <0.001               |
| >1                                          | 722           | 9.6  | 378           | 29.6 | 301              | 7.3  | 43             | 2.0  |                      |
| 0-0.9                                       | 6792          | 90.4 | 897           | 70.4 | 3828             | 92.7 | 2067           | 98.0 |                      |
| <b>8. Wine (glasses/d)</b>                  |               |      |               |      |                  |      |                |      | <0.001               |
| >7                                          | 232           | 3.1  | 5             | 0.4  | 108              | 2.6  | 119            | 5.6  |                      |
| 0-2.9                                       | 2719          | 36.2 | 385           | 30.2 | 1527             | 37.0 | 807            | 38.2 |                      |
| 3-6.9                                       | 677           | 9.0  | 100           | 7.8  | 361              | 8.7  | 216            | 10.2 |                      |
| Never                                       | 3886          | 51.7 | 785           | 61.6 | 2133             | 51.7 | 968            | 45.9 |                      |
| <b>9. Legumes (servings/w)</b>              |               |      |               |      |                  |      |                |      | <0.001               |
| >3                                          | 1449          | 19.3 | 51            | 4.0  | 569              | 13.8 | 829            | 39.3 |                      |
| 0-0.9                                       | 1209          | 16.1 | 354           | 27.8 | 676              | 16.4 | 179            | 8.5  |                      |
| 1-2.9                                       | 4856          | 64.6 | 870           | 68.2 | 2884             | 69.8 | 1102           | 52.2 |                      |
| <b>10. Fish (servings/w)</b>                |               |      |               |      |                  |      |                |      | <0.001               |
| >3                                          | 1241          | 16.5 | 26            | 2.0  | 473              | 11.5 | 742            | 35.2 |                      |
| 0-0.9                                       | 2174          | 28.9 | 526           | 41.3 | 1263             | 30.6 | 385            | 18.2 |                      |
| 1-2.9                                       | 4099          | 54.6 | 723           | 56.7 | 2393             | 58.0 | 983            | 46.6 |                      |
| <b>11. Non-homemade pastries (units/w)</b>  |               |      |               |      |                  |      |                |      | <0.001               |
| >2                                          | 1832          | 24.4 | 748           | 58.7 | 910              | 22.0 | 174            | 8.2  |                      |
| 0-1.9                                       | 5682          | 75.6 | 527           | 41.3 | 3219             | 78.0 | 1936           | 91.8 |                      |
| <b>12. Nuts (servings/w)</b>                |               |      |               |      |                  |      |                |      | <0.001               |
| >3                                          | 2461          | 32.8 | 106           | 8.3  | 1049             | 25.4 | 1306           | 61.9 |                      |
| 0-0.9                                       | 2822          | 37.6 | 687           | 53.9 | 1778             | 43.1 | 357            | 16.9 |                      |
| 1-2.9                                       | 2231          | 29.7 | 482           | 37.8 | 1302             | 31.5 | 447            | 21.2 |                      |
| <b>13. While meat preference</b>            |               |      |               |      |                  |      |                |      | <0.001               |
| No                                          | 1434          | 19.1 | 537           | 42.1 | 705              | 17.1 | 192            | 9.1  |                      |
| Yes                                         | 6080          | 80.9 | 738           | 57.9 | 3424             | 82.9 | 1918           | 90.9 |                      |
| <b>14. Sofrito<sup>3</sup> (servings/w)</b> |               |      |               |      |                  |      |                |      | <0.001               |
| >2                                          | 2603          | 34.6 | 147           | 11.5 | 1357             | 32.9 | 1099           | 52.1 |                      |
| 0-0.9                                       | 1277          | 17.0 | 282           | 22.1 | 796              | 19.3 | 199            | 9.4  |                      |
| 1-2.9                                       | 3634          | 48.4 | 846           | 66.4 | 1976             | 47.9 | 812            | 38.5 |                      |

<sup>1</sup> Foods groups derived from the 14-item MEDAS questionnaire as described in Table S1 (Supplementary material)

<sup>2</sup> Differences between the three MedDiet adherence groups were evaluated by the Chi-squared test.

<sup>3</sup> Sofrito is a mixture of lightly fried onions and garlic, usually with tomatoes and other vegetables, used as a base for soups and stews.

**Supplementary Table S3:** Factors associated with adherence to the MedDiet during the Spanish confinement

|                                    |                   | High vs medium-low adherence to MedDiet |             |         |             |         |             |
|------------------------------------|-------------------|-----------------------------------------|-------------|---------|-------------|---------|-------------|
|                                    |                   | Crude Model                             |             | Model 1 |             | Model 2 |             |
|                                    |                   | OR                                      | 95% CI      | OR      | 95% CI      | OR      | 95% CI      |
| <b>Gender<sup>1</sup></b>          | Men               | Ref.                                    | Ref.        |         |             |         |             |
|                                    | Women             | 1.19                                    | [1.06;1.33] |         |             |         |             |
| <b>Place of residence</b>          | Family home       | Ref.                                    | Ref.        | Ref.    | Ref.        |         |             |
|                                    | Shared flat       | 0.75                                    | [0.61;0.92] | 0.85    | [0.68;1.06] |         |             |
|                                    | Student residence | 0.27                                    | [0.08;0.88] | 0.3     | [0.09;1]    |         |             |
|                                    | Alone             | 0.93                                    | [0.79;1.1]  | 0.93    | [0.79;1.1]  |         |             |
| <b>Region by areas<sup>2</sup></b> | Central           | Ref.                                    | Ref.        |         |             |         |             |
|                                    | North             | 1.09                                    | [0.93;1.26] |         |             |         |             |
|                                    | South             | 0.97                                    | [0.86;1.09] |         |             |         |             |
| <b>Children in care</b>            | No                | Ref.                                    | Ref.        | Ref.    | Ref.        | Ref.    | Ref.        |
|                                    | Yes               | 1.05                                    | [0.95;1.17] | 0.94    | [0.84;1.06] | 0.93    | [0.82;1.06] |
| <b>Educational level</b>           | Basic             | Ref.                                    | Ref.        | Ref.    | Ref.        |         |             |
|                                    | Professional      | 1.05                                    | [0.82;1.35] | 1.11    | [0.86;1.43] |         |             |
|                                    | University        | 1.44                                    | [1.17;1.78] | 1.5     | [1.21;1.85] |         |             |
|                                    | Postgraduate      | 1.59                                    | [1.28;1.96] | 1.59    | [1.28;1.96] |         |             |
|                                    | Without           | 1.70                                    | [0.71;4.13] | 1.70    | [0.71;4.13] |         |             |
| <b>Age (years)</b>                 | 21-35             | Ref.                                    | Ref.        |         |             |         |             |
|                                    | 36-50             | 1.2                                     | [1.06;1.36] |         |             |         |             |
|                                    | 51-65             | 1.35                                    | [1.19;1.54] |         |             |         |             |
|                                    | >65               | 1.51                                    | [1.21;1.88] |         |             |         |             |
|                                    | <20               | 0.86                                    | [0.62;1.19] |         |             |         |             |
| <b>Meals out-of-home</b>           | 0                 | Ref.                                    | Ref.        | Ref.    | Ref.        | Ref.    | Ref.        |
|                                    | 1                 | 0.7                                     | [0.62;0.79] | 0.72    | [0.64;0.82] | 0.71    | [0.63;0.81] |
|                                    | 2                 | 0.53                                    | [0.43;0.64] | 0.55    | [0.46;0.67] | 0.56    | [0.46;0.68] |
|                                    | 3                 | 0.67                                    | [0.59;0.77] | 0.69    | [0.61;0.79] | 0.72    | [0.62;0.83] |
| <b>Alcohol intake</b>              | As before         | Ref.                                    | Ref.        | Ref.    | Ref.        | Ref.    | Ref.        |
|                                    | Lower             | 0.78                                    | [0.7;0.86]  | 0.8     | [0.71;0.89] | 0.8     | [0.71;0.89] |
|                                    | Higher            | 0.61                                    | [0.5;0.73]  | 0.62    | [0.51;0.75] | 0.61    | [0.5;0.74]  |
| <b>Difficult finding foods</b>     | No                | Ref.                                    | Ref.        | Ref.    | Ref.        | Ref.    | Ref.        |
|                                    | Yes               | 0.97                                    | [0.87;1.09] | 1.02    | [0.91;1.15] | 1.02    | [0.91;1.15] |
| <b>Type of cooking</b>             | Stew              | Ref.                                    | Ref.        | Ref.    | Ref.        | Ref.    | Ref.        |
|                                    | Fried             | 0.36                                    | [0.25;0.5]  | 0.38    | [0.27;0.53] | 0.39    | [0.27;0.55] |
|                                    | Oven              | 0.96                                    | [0.83;1.11] | 1.00    | [0.86;1.16] | 0.96    | [0.83;1.12] |
|                                    | Microwave         | 0.77                                    | [0.57;1.03] | 0.77    | [0.57;1.03] | 0.77    | [0.57;1.05] |
|                                    | Griddle           | 0.97                                    | [0.86;1.09] | 0.97    | [0.86;1.09] | 0.97    | [0.86;1.09] |
| <b>Frequency of cooking</b>        | As before         | Ref.                                    | Ref.        | Ref.    | Ref.        | Ref.    | Ref.        |
|                                    | Lower             | 0.55                                    | [0.4;0.75]  | 0.59    | [0.43;0.81] | 0.59    | [0.43;0.8]  |
|                                    | Higher            | 0.81                                    | [0.73;0.9]  | 0.83    | [0.75;0.92] | 0.8     | [0.71;0.89] |
| <b>Fried foods intake</b>          | As before         | Ref.                                    | Ref.        | Ref.    | Ref.        | Ref.    | Ref.        |
|                                    | Lower             | 0.91                                    | [0.8;1.03]  | 0.92    | [0.81;1.04] | 0.91    | [0.8;1.03]  |

|                                       |           |      |             |      |             |      |             |
|---------------------------------------|-----------|------|-------------|------|-------------|------|-------------|
|                                       | Higher    | 0.29 | [0.22;0.39] | 0.31 | [0.23;0.42] | 0.32 | [0.24;0.44] |
| <b>Fried foods frequency per week</b> |           |      |             |      |             |      |             |
|                                       | 1-3       | Ref. | Ref.        | Ref. | Ref.        | Ref. | Ref.        |
|                                       | 4-6       | 0.7  | [0.51;0.97] | 0.71 | [0.52;0.99] | 0.75 | [0.54;1.04] |
|                                       | >7        | 1.08 | [0.4;2.93]  | 1.1  | [0.41;2.99] | 1.4  | [0.51;3.87] |
|                                       | <1        | 1.78 | [1.58;2.01] | 1.78 | [1.58;2.01] | 1.75 | [1.55;1.98] |
|                                       | Never     | 2.53 | [2.2;2.9]   | 2.53 | [2.2;2.9]   |      |             |
| <b>Oil used for frying</b>            |           |      |             |      |             |      |             |
|                                       | Olive oil | Ref. | Ref.        | Ref. | Ref.        | Ref. | Ref.        |
|                                       | Sunflower | 0.51 | [0.42;0.61] | 0.53 | [0.44;0.64] | 0.56 | [0.46;0.68] |
|                                       | None      | 1.74 | [1.53;1.97] | 1.82 | [1.6;2.06]  | 1.8  | [1.58;2.05] |
|                                       | Other     | 0.93 | [0.52;1.65] | 0.99 | [0.61;1.85] | 1.11 | [0.62;1.99] |
| <b>Snacking frequency</b>             |           |      |             |      |             |      |             |
|                                       | As before | Ref. | Ref.        | Ref. | Ref.        | Ref. | Ref.        |
|                                       | Lower     | 0.99 | [0.86;1.14] | 0.99 | [0.86;1.15] | 1.01 | [0.88;1.17] |
|                                       | Higher    | 0.63 | [0.57;0.71] | 0.66 | [0.59;0.74] | 0.67 | [0.6;0.76]  |
| <b>Fast food frequency</b>            |           |      |             |      |             |      |             |
|                                       | As before | Ref. | Ref.        | Ref. | Ref.        | Ref. | Ref.        |
|                                       | Lower     | 0.73 | [0.65;0.81] | 0.75 | [0.67;0.84] | 0.74 | [0.66;0.83] |
|                                       | Higher    | 0.27 | [0.19;0.37] | 0.29 | [0.21;0.4]  | 0.3  | [0.22;0.42] |
| <b>Eating more</b>                    |           |      |             |      |             |      |             |
|                                       | No        | Ref. | Ref.        | Ref. | Ref.        | Ref. | Ref.        |
|                                       | Yes       | 0.54 | [0.49;0.61] | 0.56 | [0.5;0.62]  | 0.58 | [0.51;0.65] |
| <b>Physical activity</b>              |           |      |             |      |             |      |             |
|                                       | As before | Ref. | Ref.        | Ref. | Ref.        |      |             |
|                                       | Lower     | 0.83 | [0.73;0.94] | 0.81 | [0.71;0.92] |      |             |
|                                       | Higher    | 0.91 | [0.77;1.08] | 0.96 | [0.81;1.14] |      |             |
|                                       | As before | 0.34 | [0.25;0.45] | 0.34 | [0.25;0.45] |      |             |
|                                       |           | 0.66 | [0.61;0.75] | 0.68 | [0.61;0.76] |      |             |
| <b>Weight gain</b>                    |           |      |             |      |             |      |             |
|                                       | No        | Ref. | Ref.        | Ref. | Ref.        | Ref. | Ref.        |
|                                       | Unknown   | 0.66 | [0.59;0.74] | 1.01 | [1;1.03]    | 0.7  | [0.63;0.79] |
|                                       | Yes       | 0.53 | [0.44;0.63] | 0.53 | [0.45;0.63] | 0.56 | [0.47;0.67] |
| <b>Days</b>                           |           | 1.01 | [1;1.03]    | 1.01 | [1;1.03]    | 1.02 | [1;1.03]    |
| <b>Week<sup>3</sup></b>               |           |      |             |      |             |      |             |
|                                       | 1         | Ref. | Ref.        | Ref. | Ref.        | Ref. | Ref.        |
|                                       | 2         | 1.06 | [0.93;1.2]  | 1.09 | [0.95;1.24] | 1.12 | [0.98;1.28] |
|                                       | 3         | 1.03 | [0.85;1.25] | 1.05 | [0.87;1.28] | 1.1  | [0.9;1.34]  |

<sup>1</sup> Numbers do not sum up because there were five respondents who reported another gender (data not shown).

<sup>2</sup> Spanish Autonomous regions were grouped into areas: see footnote Table 1.

<sup>3</sup> Weeks or days of confinement

Crude model: unadjusted for any variable

Adjusted models. Model 1: adjusted for gender (men, women, other), age groups (<20, 20-35y, 25-50y, 50-65y, >65y) and regions (Central, Northern and Southern). Model 2: Model 1 and educational level (primary, professional, university, postgraduate), residence (family home, shared flat, residence, alone), physical activity (similar, higher, lower, never).

**Supplementary Table S4.** MEDAS-derived foods items by level of adherence to the MedDiet before the COVID-19 Spanish confinement

| MEDAS food groups <sup>1</sup>              | Low (N=2,447) |       | Medium (N=3,773) |       | High (N=1,294) |      | p-value <sup>2</sup> |
|---------------------------------------------|---------------|-------|------------------|-------|----------------|------|----------------------|
|                                             | N             | %     | N                | %     | N              | %    |                      |
| <b>1. Olive oil for cooking</b>             |               |       |                  |       |                |      | <0.001               |
| No                                          | 70            | 2.9   | 55               | 1.5   | 10             | 0.8  |                      |
| Yes                                         | 2377          | 97.1  | 3718             | 98.5  | 1284           | 99.2 |                      |
| <b>2. Olive oil (tablespoons/d)</b>         |               |       |                  |       |                |      | <0.001               |
| >4                                          | 435           | 17.8  | 1095             | 29.0  | 619            | 47.8 |                      |
| 0-1.9                                       | 548           | 22.4  | 633              | 16.8  | 163            | 12.6 |                      |
| 2-3.9                                       | 1464          | 59.8  | 2045             | 54.2  | 512            | 39.6 |                      |
| <b>3. Vegetables (servings/d)</b>           |               |       |                  |       |                |      | <0.001               |
| >2                                          | 308           | 12.6  | 1258             | 33.3  | 993            | 76.7 |                      |
| 0-0.9                                       | 701           | 28.6  | 539              | 14.3  | 36             | 2.8  |                      |
| 1-1.9                                       | 1438          | 58.8  | 1976             | 52.4  | 265            | 20.5 |                      |
| <b>4. Fruits (servings/d)</b>               |               |       |                  |       |                |      | <0.001               |
| >3                                          | 287           | 11.7  | 853              | 22.6  | 711            | 54.9 |                      |
| 0-0.9                                       | 712           | 29.1  | 677              | 17.9  | 81             | 6.3  |                      |
| 1-2.9                                       | 1448          | 59.2  | 2243             | 59.4  | 502            | 38.8 |                      |
| <b>5. Red meat (servings/d)</b>             |               |       |                  |       |                |      | <0.001               |
| >1                                          | 760           | 31.1  | 430              | 11.4  | 52             | 4.0  |                      |
| 0-0.9                                       | 1687          | 68.9  | 3343             | 88.6  | 1242           | 96.0 |                      |
| <b>6. Fats (servings/d)</b>                 |               |       |                  |       |                |      | <0.001               |
| >1                                          | 232           | 9.5   | 108              | 2.9   | 11             | 0.9  |                      |
| 0-0.9                                       | 2215          | 90.5  | 3665             | 97.1  | 1283           | 99.1 |                      |
| <b>7. Sweet beverages (servings/d)</b>      |               |       |                  |       |                |      | <0.001               |
| >1                                          | 474           | 19.4  | 228              | 6.    | 20             | 1.5  |                      |
| 0-0.9                                       | 1973          | 80.6  | 3545             | 94.0  | 1274           | 98.5 |                      |
| <b>8. Wine (glasses/d)</b>                  |               |       |                  |       |                |      | <0.001               |
| >7                                          | 29            | 1.2   | 118              | 3.1   | 85             | 6.6  |                      |
| 0-2.9                                       | 809           | 33.1  | 1415             | 37.5  | 495            | 38.3 |                      |
| 3-6.9                                       | 196           | 8.0   | 343              | 9.1   | 138            | 10.7 |                      |
| Never                                       | 1413          | 57.7  | 1897             | 50.3  | 576            | 44.5 |                      |
| <b>9. Legumes (servings/w)</b>              |               |       |                  |       |                |      | <0.001               |
| >3                                          | 221           | 9.0   | 707              | 18.7  | 521            | 40.3 |                      |
| 0-0.9                                       | 537           | 21.9  | 563              | 14.9  | 109            | 8.4  |                      |
| 1-2.9                                       | 1689          | 69.0  | 2503             | 66.3  | 664            | 51.3 |                      |
| <b>10. Fish (servings/w)</b>                |               |       |                  |       |                |      | <0.001               |
| >3                                          | 151           | 6.2   | 593              | 15.7  | 497            | 38.4 |                      |
| 0-0.9                                       | 938           | 38.3  | 1016             | 26.9  | 220            | 17.0 |                      |
| 1-2.9                                       | 1358          | 55.5  | 2164             | 57.4  | 577            | 44.6 |                      |
| <b>11. Non-homemade pastries (unit/day)</b> |               |       |                  |       |                |      | <0.001               |
| >2                                          | 1005          | 41.1  | 727              | 19.3  | 100            | 7.7  |                      |
| 0-1.9                                       | 1442          | 58.9  | 3046             | 80.7  | 1194           | 92.3 |                      |
| <b>12. Nuts (servings/w)</b>                |               |       |                  |       |                |      | <0.001               |
| >3                                          | 330           | 13.5  | 1264             | 33.5  | 867            | 67.0 |                      |
| 0-0.9                                       | 1227          | 50.1  | 1420             | 37.6  | 175            | 13.5 |                      |
| 1-2.9                                       | 890           | 36.4  | 1089             | 28.9  | 252            | 19.5 |                      |
| <b>13. White meat</b>                       |               |       |                  |       |                |      | <0.001               |
| No                                          | 773           | 31.6  | 546              | 14.5  | 115            | 8.9  |                      |
| Yes                                         | 1674          | 68.40 | 3227             | 85.50 | 1179           | 91.1 |                      |
| <b>14. Sofrito<sup>3</sup> (servings/w)</b> |               |       |                  |       |                |      | <0.001               |
| >3                                          | 462           | 18.9  | 1463             | 38.8  | 678            | 52.4 |                      |
| 0-0.9                                       | 509           | 20.8  | 652              | 17.3  | 116            | 9.0  |                      |
| 1-2.9                                       | 1476          | 60.3  | 1658             | 43.9  | 500            | 38.6 |                      |

<sup>1</sup> Foods groups derived from the 14-item MEDAS questionnaire as described in Table S1 (Supplementary material)

<sup>2</sup> Differences between the three adherence groups in were evaluated by the Chi-squared test.

<sup>3</sup>Sofrito is a mixture of lightly fried onions and garlic, usually with tomatoes and other vegetables, used as a base for soups and stews.

**Supplementary Table S5.** Socio-demographic factors associated with the change in the adherence to the MedDiet during the Spanish confinement

|                                    | Non-change<br>N=4,122 |           | Change in MD adherence<br>N=3,392 |           | p-value <sup>2</sup> | Crude model <sup>3</sup> |                    | Adjusted model <sup>4</sup> |                    |
|------------------------------------|-----------------------|-----------|-----------------------------------|-----------|----------------------|--------------------------|--------------------|-----------------------------|--------------------|
|                                    | N                     | %         | N                                 | %         |                      | OR                       | 95% CI             | OR                          | 95% CI             |
| <b>Gender<sup>1</sup></b>          |                       |           |                                   |           | 0.391                |                          |                    |                             |                    |
| Men                                | 1235                  | 30.0      | 969                               | 28.6      |                      | Ref.                     |                    | NA                          |                    |
| Women                              | 2884                  | 70.0      | 2421                              | 71.4      |                      | 1.07                     | [0.97;1.18]        |                             |                    |
| <b>Place of residence</b>          |                       |           |                                   |           | <0.001               |                          |                    |                             |                    |
| Family home                        | 3440                  | 83.5      | 2710                              | 79.9      |                      | Ref.                     |                    | Ref.                        |                    |
| Shared flat                        | 282                   | 6.8       | 253                               | 7.5       |                      | 1.14                     | [0.95;1.36]        | 1.1                         | [0.91;1.33]        |
| Student residence                  | 13                    | 0.3       | 18                                | 0.5       |                      | 1.75                     | [0.86;3.68]        | 1.69                        | [0.82;3.46]        |
| Alone                              | 387                   | 9.4       | 411                               | 12.1      |                      | <b>1.35</b>              | <b>[1.16;1.56]</b> | <b>1.36</b>                 | <b>[1.17;1.58]</b> |
| <b>Region by areas<sup>5</sup></b> |                       |           |                                   |           | 0.028                |                          |                    |                             |                    |
| Central                            | 1205                  | 29.2      | 1061                              | 31.3      |                      | Ref.                     |                    | Ref.                        |                    |
| North                              | 708                   | 17.2      | 515                               | 15.2      |                      | <b>0.83</b>              | <b>[0.72;0.95]</b> | <b>0.67</b>                 | <b>[0.46;0.95]</b> |
| South                              | 2209                  | 53.6      | 1816                              | 53.5      |                      | 0.93                     | [0.84;1.04]        | 0.92                        | [0.67;1.26]        |
| <b>Children in care</b>            |                       |           |                                   |           | 0.024                |                          |                    |                             |                    |
| No                                 | 2422                  | 58.8      | 2081                              | 61.4      |                      | Ref.                     |                    | Ref.                        |                    |
| Yes                                | 1700                  | 41.2      | 1311                              | 38.6      |                      | <b>0.90</b>              | <b>[0.82;0.98]</b> | <b>0.90</b>                 | <b>[0.81;1.00]</b> |
| <b>Educational level</b>           |                       |           |                                   |           | 0.010                |                          |                    |                             |                    |
| University                         | 1941                  | 47.1      | 1546                              | 45.6      |                      | Ref.                     |                    | Ref.                        |                    |
| Postgraduate                       | 1237                  | 30.0      | 1133                              | 33.4      |                      | <b>1.15</b>              | <b>[1.04;1.28]</b> | <b>1.13</b>                 | <b>[1.02;1.26]</b> |
| Professional                       | 586                   | 14.2      | 456                               | 13.4      |                      | 0.98                     | [0.85;1.12]        | 0.98                        | [0.85;1.12]        |
| Primary                            | 358                   | 8.7       | 257                               | 7.6       |                      | 0.90                     | [0.76;1.07]        | 0.91                        | [0.76;1.09]        |
| <b>Age (years)</b>                 |                       |           |                                   |           | 0.008                |                          |                    |                             |                    |
| 21-35                              | 1378                  | 33.4      | 1180                              | 34.8      |                      | Ref.                     |                    | NA                          |                    |
| 36-50                              | 1279                  | 31.0      | 1092                              | 32.2      |                      | 1.00                     | [0.89;1.12]        |                             |                    |
| 51-65                              | 1100                  | 26.7      | 828                               | 24.4      |                      | <b>0.88</b>              | <b>[0.78;0.99]</b> |                             |                    |
| >65                                | 255                   | 6.2       | 173                               | 5.1       |                      | <b>0.79</b>              | <b>[0.64;0.98]</b> |                             |                    |
| <20                                | 110                   | 2.7       | 119                               | 3.5       |                      | 1.26                     | [0.96;1.66]        |                             |                    |
|                                    | <b>Mean</b>           | <b>SD</b> | <b>Mean</b>                       | <b>SD</b> | <b>p-value</b>       | <b>OR</b>                | <b>95% CI</b>      | <b>OR</b>                   | <b>95% CI</b>      |
| Days                               | 10.1                  | 3.30      | 10.2                              | 3.37      | 0.144                | 1.01                     | [1.00;1.02]        | 1.02                        | <b>[1.00;1.03]</b> |
| Weight                             | 68.5                  | 17.6      | 69.2                              | 14.6      | 0.073                | 1.00                     | [1.00;1.01]        | <b>1.01</b>                 | <b>[1.00;1.01]</b> |

<sup>1</sup> Numbers do not sum up because there were five respondents who reported another gender (data not shown).

<sup>2</sup> Differences between the groups were evaluated by the Chi-squared test.

<sup>3</sup> Crude model: unadjusted for any variable

<sup>4</sup> Adjusted model: adjusted for gender (men, women, other), age groups (<20y, 20-35y, 25-50y, 50-65y, >65y), regions (Central, Northern and Southern), educational level (primary, professional, university, postgraduate), residence (family home, shared flat, residence, alone), physical activity (similar, higher, lower, never). For every variable, the adjusting variable was simultaneously removed from the model.

<sup>5</sup> Spanish Autonomous regions were grouped into areas: see Table 1 footnote.  
Statistically significant ORs are highlighted in bold.

**Supplementary Table S6:** Subgroup analysis by gender on the association between fruits, vegetables and olive oil intake and the change in the adherence to the MedDiet during the COVID-19 Spanish confinement

|                                          | Men (N=2,204)   |              | Women (N=5,305) |              |
|------------------------------------------|-----------------|--------------|-----------------|--------------|
|                                          | OR <sup>1</sup> | 95% CI       | OR <sup>1</sup> | 95% CI       |
| <b>Olive oil (tablespoons/d)</b>         |                 |              |                 |              |
| As before                                | Ref.            | Ref.         | Ref.            | Ref.         |
| Lower                                    | 3.13            | [2.20;4.44]  | 3.13            | [2.45;4.05]  |
| Higher                                   | 8.00            | [5.40;12.32] | 3.71            | [2.94;4.65]  |
| p-value for interaction by gender: 0.006 |                 |              |                 |              |
| <b>Vegetables (servings/d)</b>           |                 |              |                 |              |
| As before                                | Ref.            | Ref.         | Ref.            | Ref.         |
| Lower                                    | 2.32            | [1.76;3.06]  | 1.34            | [1.12;1.59]  |
| Higher                                   | 7.17            | [5.43;9.57]  | 8.25            | [6.81;10.06] |
| p-value for interaction by gender: 0.001 |                 |              |                 |              |
| <b>Fruits (servings/d)</b>               |                 |              |                 |              |
| As before                                | Ref.            | Ref.         | Ref.            | Ref.         |
| Lower                                    | 2.89            | [2.18;3.83]  | 1.82            | [1.55;2.14]  |
| Higher                                   | 6.30            | [4.90;8.16]  | 6.05            | [5.10;7.18]  |
| p-value for interaction by gender: 0.016 |                 |              |                 |              |

<sup>1</sup> Adjusted model: adjusted for age groups (<20, 20-35y, 25-50y, 50-65y, >65y), regions (Central, Northern and Southern), educational level (primary, professional, university, postgraduate), residence (family home, shared flat, residence, alone), physical activity (similar, higher, lower, never).

**Supplementary Table S7:** Sensitivity analyses performed on variables associated with the change in the adherence to the MedDiet during the Spanish confinement

|                                    | 1. Removing first week of confinement |      |                        |      |                      |             |             | 2. As relative change (high > vs low) |      |         |                      |                      |             |             | 3. Improved MedDiet <sup>5</sup> |             |
|------------------------------------|---------------------------------------|------|------------------------|------|----------------------|-------------|-------------|---------------------------------------|------|---------|----------------------|----------------------|-------------|-------------|----------------------------------|-------------|
|                                    | Non-change                            |      | Change in MD adherence |      |                      | Non-change  |             | Change in MD adherence                |      |         | Non-change vs change |                      |             |             |                                  |             |
|                                    | N=3,297                               |      | N=2,702                |      | p-value <sup>3</sup> | Crude Model |             | N=4,873                               |      | N=2,641 |                      | p-value <sup>3</sup> | Crude Model |             | Crude Model                      |             |
|                                    | N                                     | %    | N                      | %    |                      | OR          | 95% CI      | N                                     | %    | N       | %                    |                      | OR          | 95% CI      | OR                               | 95% CI      |
| <b>Gender<sup>1</sup></b>          |                                       |      |                        |      | 0.796                |             |             |                                       |      |         |                      | 0.902                |             |             |                                  |             |
| men                                | 935                                   | 28.4 | 747                    | 27.6 |                      | Ref.        | Ref.        | 1422                                  | 29.2 | 782     | 29.6                 |                      | Ref.        | Ref.        | Ref.                             | Ref.        |
| women                              | 2359                                  | 71.5 | 1958                   | 72.3 |                      | 1.04        | [0.93;1.16] | 3448                                  | 70.8 | 1857    | 70.3                 |                      | 0.98        | [0.88;1.09] | 1.09                             | [0.98;1.2]  |
| <b>Place of residence</b>          |                                       |      |                        |      | <0.001               |             |             |                                       |      |         |                      | <0.001               |             |             |                                  |             |
| Family home                        | 2739                                  | 83.1 | 2146                   | 79.3 |                      | Ref.        | Ref.        | 4060                                  | 83.3 | 2090    | 79.1                 |                      | Ref.        | Ref.        | Ref.                             | Ref.        |
| Shared flat                        | 244                                   | 7.40 | 214                    | 7.91 |                      | 1.12        | [0.92;1.36] | 326                                   | 6.69 | 209     | 7.91                 |                      | 1.25        | [1.04;1.49] | 1.11                             | [0.93;1.33] |
| Residence                          | 10                                    | 0.30 | 13                     | 0.48 |                      | 1.65        | [0.72;3.92] | 16                                    | 0.33 | 15      | 0.57                 |                      | 1.82        | [0.88;3.73] | 1.48                             | [0.72;3.02] |
| Alone                              | 304                                   | 9.22 | 334                    | 12.3 |                      | 1.40        | [1.19;1.65] | 471                                   | 9.67 | 327     | 12.4                 |                      | 1.35        | [1.16;1.57] | 1.31                             | [1.13;1.52] |
| <b>Region by areas<sup>2</sup></b> |                                       |      |                        |      | 0.019                |             |             |                                       |      |         |                      | 0.022                |             |             |                                  |             |
| Central                            | 1017                                  | 30.8 | 904                    | 33.4 |                      | Ref.        | Ref.        | 1439                                  | 29.5 | 827     | 31.3                 |                      | Ref.        | Ref.        | Ref.                             | Ref.        |
| North                              | 670                                   | 20.3 | 482                    | 17.8 |                      | 0.81        | [0.70;0.94] | 833                                   | 17.1 | 390     | 14.8                 |                      | 0.81        | [0.70;0.94] | 0.86                             | [0.75;0.99] |
| South                              | 1610                                  | 48.8 | 1321                   | 48.8 |                      | 0.92        | [0.82;1.04] | 2601                                  | 53.4 | 1424    | 53.9                 |                      | 0.95        | [0.86;1.06] | 0.97                             | [0.87;1.07] |
| <b>Children in care</b>            |                                       |      |                        |      | 0.019                |             |             |                                       |      |         |                      | 0.002                |             |             |                                  |             |
| No                                 | 1968                                  | 59.7 | 1697                   | 62.7 |                      | Ref.        | Ref.        | 2858                                  | 58.6 | 1645    | 62.3                 |                      | Ref.        | Ref.        | Ref.                             | Ref.        |
| Yes                                | 1329                                  | 40.3 | 1010                   | 37.3 |                      | 0.88        | [0.79;0.98] | 2015                                  | 41.4 | 996     | 37.7                 |                      | 0.86        | [0.78;0.95] | 0.87                             | [0.8;0.96]  |
| <b>Educational level</b>           |                                       |      |                        |      | 0.015                |             |             |                                       |      |         |                      | 0.514                |             |             |                                  |             |
| Basic                              | 293                                   | 8.89 | 206                    | 7.61 |                      | Ref.        | Ref.        | 395                                   | 8.11 | 198     | 7.50                 |                      | Ref.        | Ref.        | Ref.                             | Ref.        |
| Professional                       | 417                                   | 12.6 | 320                    | 1.8  |                      | 1.09        | [0.87;1.37] | 579                                   | 11.9 | 310     | 11.7                 |                      | 1.07        | [0.86;1.33] | 1.13                             | [0.92;1.39] |
| University                         | 1502                                  | 45.6 | 1198                   | 44.3 |                      | 1.13        | [0.93;1.38] | 2279                                  | 46.8 | 1208    | 45.7                 |                      | 1.06        | [0.88;1.27] | 1.1                              | [0.93;1.31] |
| Postgraduate                       | 997                                   | 30.2 | 925                    | 34.2 |                      | 1.32        | [1.08;1.61] | 1506                                  | 30.9 | 864     | 32.7                 |                      | 1.14        | [0.95;1.39] | 1.19                             | [0.99;1.43] |
| Without                            | 9                                     | 0.27 | 9                      | 0.33 |                      | 1.42        | [0.54;3.75] | 12                                    | 0.25 | 10      | 0.38                 |                      | 1.67        | [0.68;3.96] | 1.68                             | [0.69;4.03] |
| <b>Age (years)</b>                 |                                       |      |                        |      | 0.014                |             |             |                                       |      |         |                      | 0.009                |             |             |                                  |             |
| 21-35                              | 1186                                  | 36.0 | 1011                   | 37.3 |                      | Ref.        | Ref.        | 1621                                  | 33.3 | 937     | 35.5                 |                      | Ref.        | Ref.        | Ref.                             | Ref.        |
| 36-50                              | 1044                                  | 31.7 | 893                    | 33.0 |                      | 1.00        | [0.89;1.13] | 1533                                  | 31.5 | 838     | 31.7                 |                      | 0.95        | [0.84;1.06] | 0.96                             | [0.86;1.08] |
| 51-65                              | 780                                   | 23.7 | 571                    | 21.1 |                      | 0.86        | [0.75;0.98] | 1294                                  | 26.6 | 634     | 24.0                 |                      | 0.85        | [0.75;0.96] | 0.79                             | [0.7;0.89]  |
| >65                                | 191                                   | 5.79 | 129                    | 4.77 |                      | 0.79        | [0.62;1.01] | 292                                   | 5.99 | 136     | 5.15                 |                      | 0.81        | [0.65;1.00] | 0.69                             | [0.57;0.85] |
| <20                                | 96                                    | 2.91 | 103                    | 3.80 |                      | 1.26        | [0.94;1.68] | 133                                   | 2.73 | 96      | 3.63                 |                      | 1.25        | [0.95;1.64] | 1.61                             | [1.22;2.12] |
| <b>Meals out-of-home</b>           |                                       |      |                        |      | <0.001               |             |             |                                       |      |         |                      | <0.001               |             |             |                                  |             |

|                                       |      |      |      |      |        |      |             |      |      |      |      |        |      |             |      |             |
|---------------------------------------|------|------|------|------|--------|------|-------------|------|------|------|------|--------|------|-------------|------|-------------|
| 0                                     | 1387 | 42.1 | 935  | 34.5 |        | Ref. | Ref.        | 2093 | 43.0 | 882  | 33.4 |        | Ref. | Ref.        | Ref. | Ref.        |
| 1                                     | 968  | 29.4 | 811  | 30.0 |        | 1.24 | [1.10;1.41] | 1416 | 29.1 | 791  | 30.0 |        | 1.33 | [1.18;1.49] | 1.24 | [1.11;1.39] |
| 2                                     | 266  | 8.07 | 327  | 12.1 |        | 1.82 | [1.52;2.19] | 411  | 8.43 | 347  | 13.1 |        | 2.00 | [1.70;2.36] | 1.83 | [1.56;2.15] |
| 3                                     | 676  | 20.5 | 634  | 23.4 |        | 1.39 | [1.21;1.59] | 953  | 19.6 | 621  | 23.5 |        | 1.55 | [1.36;1.76] | 1.38 | [1.22;1.56] |
| <b>Alcohol intake</b>                 |      |      |      |      | <0.001 |      |             |      |      |      |      | <0.001 |      |             |      |             |
| As before                             | 1260 | 38.2 | 622  | 23.0 |        | Ref. | Ref.        | 1865 | 38.3 | 564  | 21.4 |        | Ref. | Ref.        | Ref. | Ref.        |
| Lower                                 | 1675 | 50.8 | 1811 | 66.9 |        | 2.19 | [1.95;2.46] | 2481 | 50.9 | 1821 | 69.0 |        | 2.43 | [2.17;2.72] | 2.29 | [2.07;2.54] |
| Higher                                | 362  | 11.0 | 274  | 10.1 |        | 1.53 | [1.27;1.84] | 527  | 10.8 | 256  | 9.69 |        | 1.61 | [1.35;1.92] | 1.62 | [1.38;1.91] |
| <b>Difficult finding foods</b>        |      |      |      |      | <0.001 |      |             |      |      |      |      | 0.001  |      |             |      |             |
| No                                    | 2454 | 74.4 | 1889 | 69.8 |        | Ref. | Ref.        | 3610 | 74.1 | 1858 | 70.4 |        | Ref. | Ref.        | Ref. | Ref.        |
| Yes                                   | 843  | 25.6 | 818  | 30.2 |        | 1.26 | [1.13;1.41] | 1263 | 25.9 | 783  | 29.6 |        | 1.20 | [1.08;1.34] | 1.26 | [1.13;1.39] |
| <b>Type of cooking</b>                |      |      |      |      | 0.224  |      |             |      |      |      |      | 0.843  |      |             |      |             |
| Stew                                  | 938  | 28.5 | 781  | 28.9 |        | Ref. | Ref.        | 1440 | 29.6 | 768  | 29.1 |        | Ref. | Ref.        | Ref. | Ref.        |
| Fried                                 | 152  | 4.61 | 102  | 3.77 |        | 0.81 | [0.62;1.05] | 205  | 4.21 | 105  | 3.98 |        | 0.96 | [0.75;1.23] | 0.96 | [0.85;1.20] |
| Oven                                  | 611  | 18.5 | 546  | 20.2 |        | 1.07 | [0.92;1.25] | 892  | 18.3 | 506  | 19.2 |        | 1.06 | [0.92;1.22] | 1.1  | [0.97;1.26] |
| Microwave                             | 118  | 3.58 | 85   | 3.14 |        | 0.87 | [0.64;1.16] | 174  | 3.57 | 87   | 3.29 |        | 0.94 | [0.71;1.23] | 1.02 | [0.79;1.32] |
| Griddle                               | 1478 | 44.8 | 1193 | 44.1 |        | 0.97 | [0.86;1.10] | 2162 | 44.4 | 1175 | 44.5 |        | 1.02 | [0.91;1.14] | 1.06 | [0.95;1.18] |
| <b>Frequency of cooking</b>           |      |      |      |      | <0.001 |      |             |      |      |      |      | <0.001 |      |             |      |             |
| As before                             | 1871 | 56.7 | 1126 | 41.6 |        | Ref. | Ref.        | 2735 | 56.1 | 1074 | 40.7 |        | Ref. | Ref.        | Ref. | Ref.        |
| Lower                                 | 98   | 2.97 | 125  | 4.62 |        | 2.12 | [1.61;2.79] | 144  | 2.96 | 129  | 4.88 |        | 2.28 | [1.78;2.92] | 2.61 | [2.02;3.38] |
| Higher                                | 1328 | 40.3 | 1456 | 53.8 |        | 1.82 | [1.64;2.02] | 1994 | 40.9 | 1438 | 54.4 |        | 1.84 | [1.67;2.03] | 1.87 | [1.7;2.05]  |
| <b>Fried foods intake</b>             |      |      |      |      | <0.001 |      |             |      |      |      |      | <0.001 |      |             |      |             |
| As before                             | 2749 | 83.4 | 1677 | 62.0 |        | Ref. | Ref.        | 4015 | 82.4 | 1502 | 56.9 |        | Ref. | Ref.        | Ref. | Ref.        |
| Lower                                 | 320  | 9.71 | 872  | 32.2 |        | 4.46 | [3.88;5.15] | 558  | 11.5 | 967  | 36.6 |        | 4.63 | [4.11;5.22] | 4.59 | [4.04;5.21] |
| Higher                                | 228  | 6.92 | 158  | 5.84 |        | 1.14 | [0.92;1.40] | 300  | 6.16 | 172  | 6.51 |        | 1.53 | [1.26;1.86] | 1.45 | [1.26;1.86] |
| <b>Fried foods frequency per week</b> |      |      |      |      | 0.007  |      |             |      |      |      |      | 0.268  |      |             |      |             |
| 1-3                                   | 1321 | 40.1 | 978  | 36.1 |        | Ref. | Ref.        | 1905 | 39.1 | 989  | 37.4 |        | Ref. | Ref.        | Ref. | Ref.        |
| 4-6                                   | 145  | 4.40 | 108  | 3.99 |        | 1.01 | [0.77;1.31] | 201  | 4.12 | 108  | 4.09 |        | 1.04 | [0.81;1.32] | 1.22 | [0.96;1.54] |
| >7                                    | 11   | 0.33 | 9    | 0.33 |        | 1.11 | [0.44;2.72] | 17   | 0.35 | 6    | 0.23 |        | 0.69 | [0.25;1.68] | 1.12 | [0.49;2.54] |
| <1                                    | 1184 | 35.9 | 1006 | 37.2 |        | 1.15 | [1.02;1.29] | 1789 | 36.7 | 966  | 36.6 |        | 1.04 | [0.93;1.16] | 0.95 | [0.85;1.05] |
| Never                                 | 636  | 19.3 | 606  | 22.4 |        | 1.29 | [1.12;1.48] | 961  | 19.7 | 572  | 21.7 |        | 1.15 | [1.01;1.30] | 1.04 | [0.92;1.18] |
| <b>Oil used for frying</b>            |      |      |      |      | 0.137  |      |             |      |      |      |      | 0.070  |      |             |      |             |
| Olive oil                             | 2249 | 68.2 | 1779 | 65.7 |        | Ref. | Ref.        | 3375 | 69.3 | 1764 | 66.8 |        | Ref. | Ref.        | Ref. | Ref.        |
| Sunflower                             | 415  | 12.6 | 349  | 12.9 |        | 1.06 | [0.91;1.24] | 571  | 11.7 | 359  | 13.6 |        | 1.20 | [1.04;1.39] | 1.2  | [1.04;1.38] |
| None                                  | 611  | 18.5 | 563  | 20.8 |        | 1.16 | [1.02;1.33] | 885  | 18.2 | 498  | 18.9 |        | 1.08 | [0.95;1.22] | 1.04 | [0.93;1.17] |

|                            |      |      |      |      |        |      |             |      |      |      |      |        |      |             |      |             |
|----------------------------|------|------|------|------|--------|------|-------------|------|------|------|------|--------|------|-------------|------|-------------|
| Other                      | 22   | 0.67 | 16   | 0.59 |        | 0.92 | [0.47;1.76] | 42   | 0.86 | 20   | 0.76 |        | 0.91 | [0.52;1.55] | 0.99 | [0.6;1.64]  |
| <b>Snacking frequency</b>  |      |      |      |      | <0.001 |      |             |      |      |      |      | <0.001 |      |             |      |             |
| As before                  | 1729 | 52.4 | 1072 | 39.6 |        | Ref. | Ref.        | 2527 | 51.9 | 984  | 37.3 |        | Ref. | Ref.        | Ref. | Ref.        |
| Lower                      | 296  | 8.98 | 636  | 23.5 |        | 3.46 | [2.96;4.06] | 488  | 10.0 | 688  | 26.1 |        | 3.62 | [3.16;4.15] | 5.69 | [4.88;6.65] |
| Higher                     | 1272 | 38.6 | 999  | 36.9 |        | 1.27 | [1.13;1.42] | 1858 | 38.1 | 969  | 36.7 |        | 1.34 | [1.20;1.49] | 1.56 | [1.41;1.72] |
| <b>Fast food frequency</b> |      |      |      |      | <0.001 |      |             |      |      |      |      | <0.001 |      |             |      |             |
| As before                  | 2290 | 69.5 | 1258 | 46.5 |        | Ref. | Ref.        | 3400 | 69.8 | 1107 | 41.9 |        | Ref. | Ref.        | Ref. | Ref.        |
| Lower                      | 817  | 24.8 | 1327 | 49.0 |        | 2.96 | [2.65;3.30] | 1217 | 25.0 | 1406 | 53.2 |        | 3.55 | [3.20;3.93] | 3.03 | [2.74;3.35] |
| Higher                     | 190  | 5.76 | 122  | 4.51 |        | 1.17 | [0.92;1.48] | 256  | 5.25 | 128  | 4.85 |        | 1.54 | [1.23;1.92] | 2.01 | [1.63;2.48] |
| <b>Eating more</b>         |      |      |      |      | 0.119  |      |             |      |      |      |      | 0.629  |      |             |      |             |
| No                         | 2060 | 62.5 | 1745 | 64.5 |        | Ref. | Ref.        | 3112 | 63.9 | 1671 | 63.3 |        | Ref. | Ref.        | Ref. | Ref.        |
| Yes                        | 1237 | 37.5 | 962  | 35.5 |        | 0.92 | [0.83;1.02] | 1761 | 36.1 | 970  | 36.7 |        | 1.03 | [0.93;1.13] | 1.1  | [1;1.21]    |
| <b>Physical activity</b>   |      |      |      |      | 0.057  |      |             |      |      |      |      | 0.101  |      |             |      |             |
| As before                  | 614  | 18.6 | 518  | 19.1 |        | Ref. | Ref.        | 922  | 18.9 | 481  | 18.2 |        | Ref. | Ref.        | Ref. | Ref.        |
| Lower                      | 1917 | 58.1 | 1566 | 57.9 |        | 0.97 | [0.85;1.11] | 2916 | 59.8 | 1559 | 59.0 |        | 1.02 | [0.90;1.16] | 1.03 | [0.92;1.17] |
| Never                      | 541  | 16.4 | 480  | 17.7 |        | 1.05 | [0.89;1.25] | 740  | 15.2 | 456  | 17.3 |        | 1.18 | [1.01;1.39] | 1.16 | [0.99;1.35] |
| Never                      | 225  | 6.82 | 143  | 5.28 |        | 0.75 | [0.59;0.96] | 295  | 6.05 | 145  | 5.49 |        | 0.94 | [0.75;1.18] | 0.85 | [0.69;1.06] |
| <b>Weight gain</b>         |      |      |      |      | 0.195  |      |             |      |      |      |      | 0.373  |      |             |      |             |
| No                         | 1531 | 46.4 | 1320 | 48.8 |        | Ref. | Ref.        | 2299 | 47.2 | 1257 | 47.6 |        | Ref. | Ref.        | Ref. | Ref.        |
| Unknown                    | 1320 | 40.0 | 1032 | 38.1 |        | 0.91 | [0.81;1.01] | 1964 | 40.3 | 1029 | 39.0 |        | 0.96 | [0.87;1.06] | 0.96 | [0.87;1.06] |
| Yes                        | 446  | 13.5 | 355  | 13.1 |        | 0.92 | [0.79;1.08] | 610  | 12.5 | 355  | 13.4 |        | 1.06 | [0.92;1.23] | 1.2  | [1.04;1.39] |
| <b>Week<sup>4</sup></b>    |      |      |      |      | 0.050  |      |             |      |      |      |      | 0.292  |      |             |      |             |
| 1                          | NA   | NA   | NA   | NA   |        |      |             | 965  | 19.8 | 545  | 20.6 |        | Ref. | Ref.        | Ref. | Ref.        |
| 2                          | 2864 | 86.9 | 2303 | 85.1 |        | Ref. | Ref.        | 3380 | 69.4 | 1787 | 67.7 |        | 0.94 | [0.83;1.06] | 0.99 | [0.89;1.11] |
| 3                          | 433  | 13.1 | 404  | 14.9 |        | 1.16 | [1.00;1.34] | 528  | 10.8 | 309  | 11.7 |        | 1.04 | [0.87;1.23] | 1.22 | [1.03;1.45] |
| <b>Days</b>                | 10.9 | 3.26 | 11.0 | 3.32 | 0.078  | 1.01 | [1.00;1.03] | 10.1 | 3.31 | 10.1 | 3.36 | 0.143  | 1.00 | [0.99;1.02] | 1.02 | [1;1.03]    |

<sup>1</sup> Numbers do not sum up because there were five respondents who reported another gender (data not shown).

<sup>2</sup> Spanish Autonomous regions were grouped into areas: see footnote Table 1.

<sup>3</sup> Differences between the three MedDiet adherence groups were evaluated by the Chi-squared test.

<sup>4</sup> Weeks or days of confinement

<sup>5</sup> Improved MedDiet score refers to MedDiet before the confinement by accounting for snaking, alcohol consumption and intake of fried food in the MEDAS scoring. Change in adherence to MedDiet was calculated as described in the methods section. Non-change (N=3,808) vs change (N=3,706) in adherence to the MedDiet was likewise estimated.

Crude model: unadjusted for any variable.

**Supplementary Figure S1:** Relationship between weeks and days of confinement with adherence to the MedDiet and the relative change of adherence to MedDiet.

**Figure caption:** First column shows splines (multivariate-adjusted) of ORs of adherence to the MedDiet by days of confinement (top - **A**) and ORs of change in adherence to the MedDiet by days of confinement (bottom - **C**). Second column shows boxplots of adherence to the MedDiet, before and during confinement, and relative change of adherence to the MedDiet by weeks of confinement (**B**). Differences in mean adherence by groups were evaluated by means of the Kruskal-Wallis test.

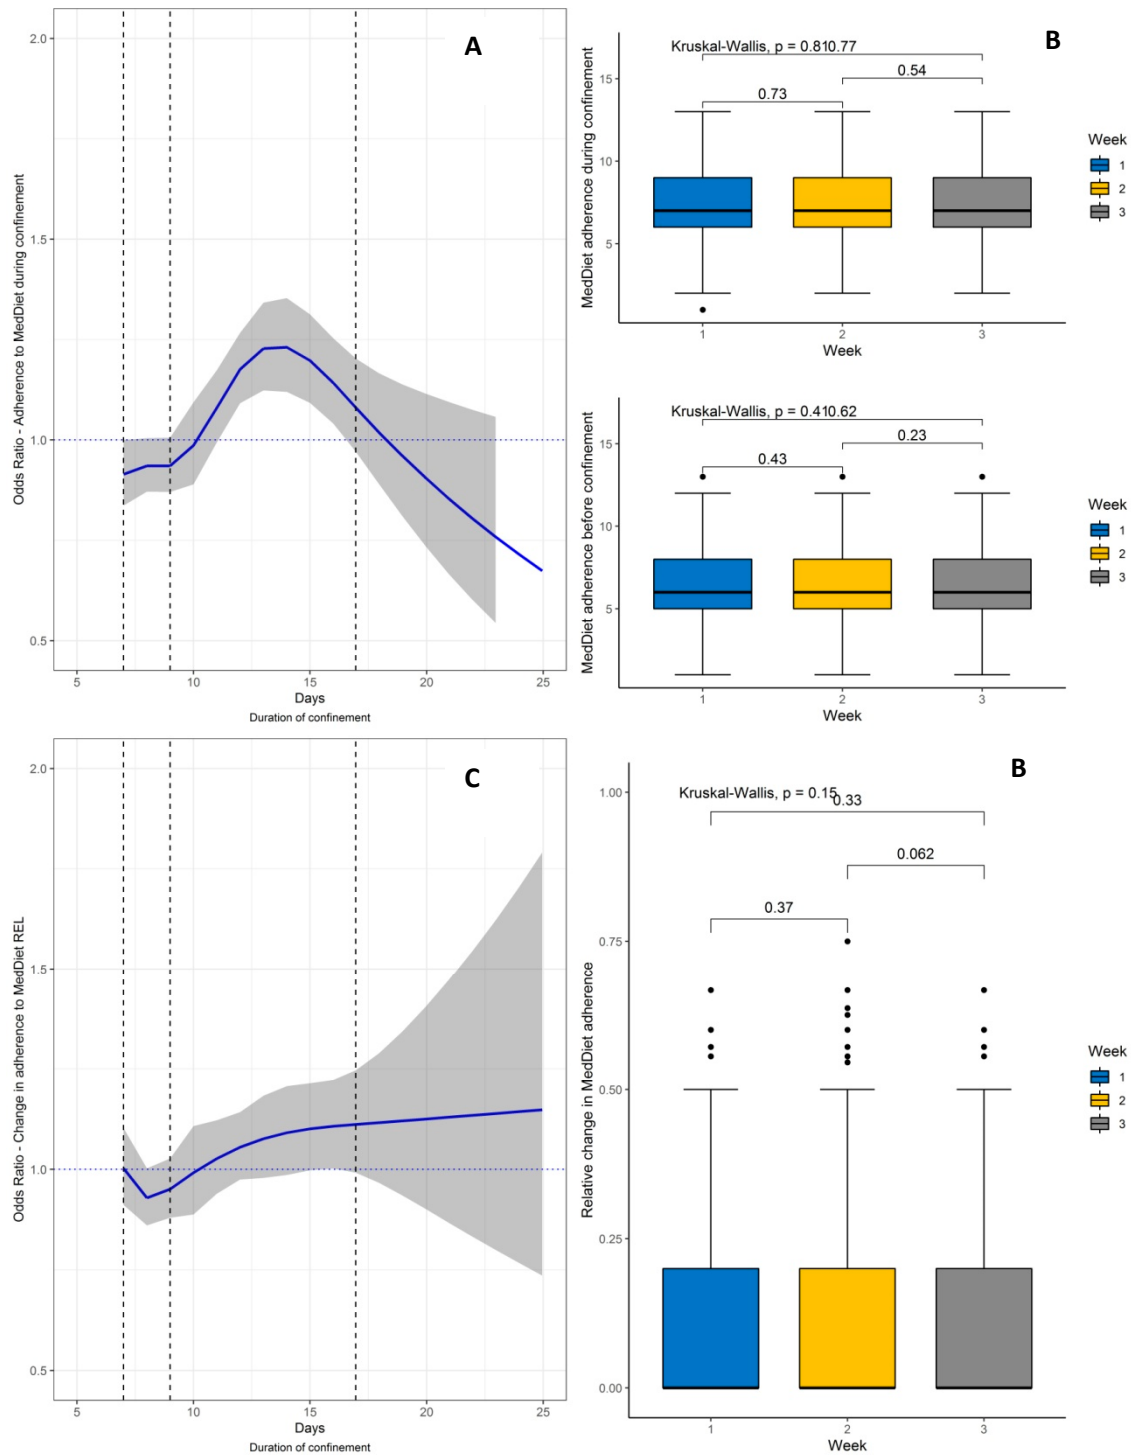

**Supplementary Figure S2:** Google Trends output for Web search queries for different terms.

**Figure caption:** Google Trends output for Web search queries for the term (a) “Bizcocho casero” (Homemade cake); (b) “Recetas caseras” (Traditional recipes) and (c) “Entrenamiento en casa” (Home workout) in Spain from March 2014 to March 2020 (left) and from February, 22<sup>nd</sup> to March 17<sup>th</sup> (right).

**(a)**

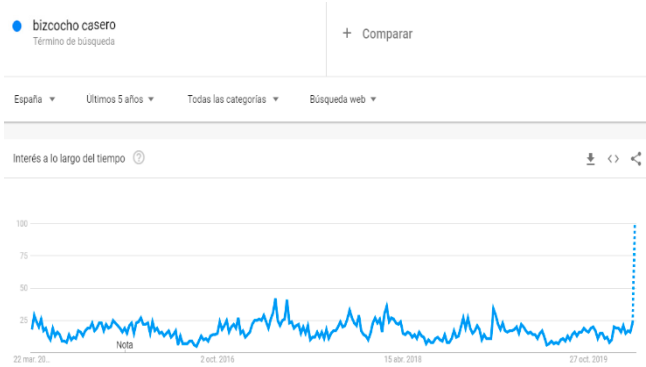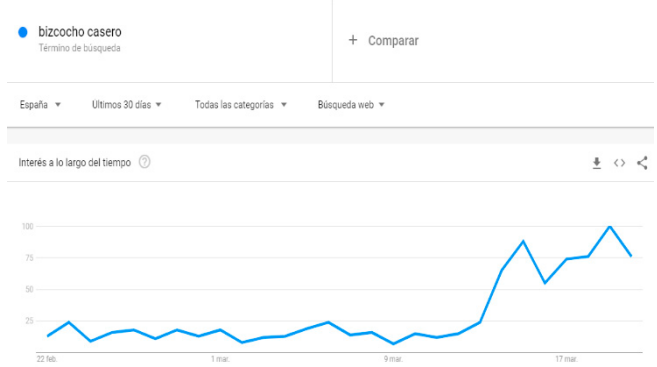

**(b)**

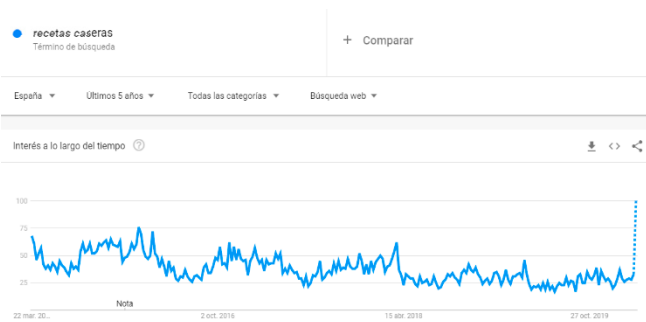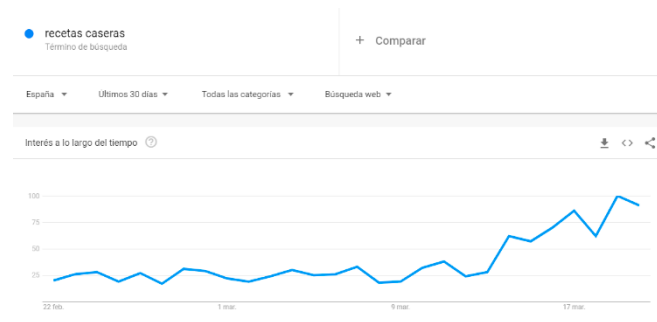

**(c)**

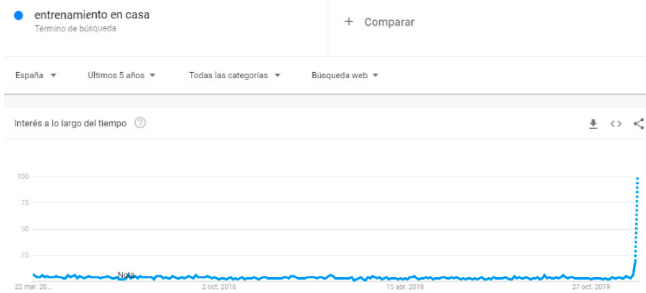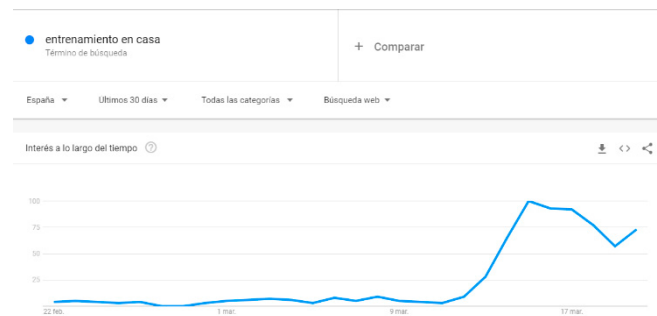

Supplement: Supplementary file 1 [file nutrients-12-01730-s001.pdf]
